# Supplementary material for: Rational construction of self-supported triangle-like MOF-derived hollow (Ni,Co)Se2arrays for electrocatalysis and supercapacitors
Source: Royal Society of Chemistry journal article supplement (doi:10.1039/c9nr00411d), 2019-01-01
Supplement: c9nr00411d1.pdf [file c9nr00411d1.pdf]

# Supporting Information

## Rational construction of self-supported triangle-like MOF-derived hollow (Ni,Co)Se<sub>2</sub> arrays for electrocatalysis and supercapacitor

Wenjiao Song,<sup>†</sup> Xue Teng,<sup>†</sup> Yangyang Liu,<sup>†</sup> Jianying Wang,<sup>†</sup> Yanli Niu,<sup>†</sup> Xiaoming He,<sup>†</sup> Cheng Zhang<sup>‡</sup> and Zuofeng Chen<sup>\*,†</sup>

<sup>†</sup>Shanghai Key Laboratory of Chemical Assessment and Sustainability, School of Chemical Science and Engineering, Tongji University, Shanghai 200092, China;

<sup>‡</sup>College of Chemical Engineering and Materials Science, Zhejiang University of Technology, Hangzhou 310014, China

### EXPERIMENTAL

**Chemicals.** Cobalt nitrate hexahydrate (Co(NO<sub>3</sub>)<sub>2</sub>·6H<sub>2</sub>O, 98%), nickel nitrate hexahydrate (Ni(NO<sub>3</sub>)<sub>2</sub>·6H<sub>2</sub>O, 98%), 2-methylimidazole (C<sub>4</sub>H<sub>6</sub>N<sub>2</sub>, 98%), sodium borohydride (NaBH<sub>4</sub>, 96%), selenium (Se, 99.9%), potassium hydroxide (KOH, 99%), acetone (C<sub>3</sub>H<sub>6</sub>O, 99.5%) and ethanol (C<sub>2</sub>H<sub>5</sub>OH, 99.5%) were obtained from Sigma Aldrich. The carbon cloth was obtained from Shanghai Hesen Electric Co. (HCP330N, 32 cm × 16 cm, 0.32 mm). All reagents were analytical grade and used as received without further purification. Deionized water (18.0 MΩ cm) was used for preparing electrolyte solutions in all experiments.

**Procedures.** *Preparation of MOF-Co/CC.* Before being used, the carbon cloth

(CC) was cleaned with acetone, ethanol and distilled water under ultrasonication. The MOF-Co/CC electrode was synthesized according to the following procedure. Briefly, a certain volume of pre-prepared 2-methylimidazole aqueous solution (0.4 M) was quickly added into the same volume aqueous solution of  $\text{Co}(\text{NO}_3)_2 \cdot 6\text{H}_2\text{O}$  (50 mM). After being mixed under magnetic stirring for 1 min, a piece of clean CC substrate was immersed into the obtained mixture and maintained at room temperature for 4 h. Then the electrode was taken out, cleaned with distilled water and ethanol for several times and finally dried at 60 °C in an electric oven to get the purple MOF-Co/CC product.

*Preparation of NiCo-LDH/CC.* A piece of MOF-Co/CC was immersed into an ethanol solution (30 mL) containing  $\text{Ni}(\text{NO}_3)_2 \cdot 6\text{H}_2\text{O}$  (0.09 g) and kept still at room temperature for 2 h. After the reaction, the obtained light green electrode was washed with distilled water and ethanol for several times and dried at 60 °C.

*Preparation of (Ni,Co)Se<sub>2</sub>/CC.* Before the selenization, NaHSe solution was synthesized. In a typical procedure, 0.065 g  $\text{NaBH}_4$  was dissolved into 1.5 mL deionized water under  $\text{N}_2$  flow to achieve a clear solution, after which 0.059 g Se powder was added into the pre-prepared  $\text{NaBH}_4$  aqueous solution. The mixture was thoroughly mixed under  $\text{N}_2$  flow to obtain the clear NaHSe solution. The as-prepared NiCo-LDH/CC was transformed into (Ni,Co)Se<sub>2</sub>/CC by a solvothermal selenization. The freshly made NaHSe solution was added into 30 mL  $\text{N}_2$ -saturated ethanol, and the flow of  $\text{N}_2$  was maintained during the whole process. Then the mixed solution was transferred into 50 mL Teflon-lined stainless steel autoclave followed by the

immersion of a piece of NiCo-LDH/CC. The (Ni,Co)Se<sub>2</sub>/CC was finally obtained after being heated in an electric oven at 140 °C for 10 h.

*Preparation of CoSe<sub>2</sub>/CC.* Following the preparation of the MOF-Co/CC array electrode, the Co(OH)<sub>2</sub>/CC array electrode was first synthesized via a similar ion-etching process by replacing Ni(NO<sub>3</sub>)<sub>2</sub> with Co(NO<sub>3</sub>)<sub>2</sub> and then transformed into CoSe<sub>2</sub> by the same selenization procedure.

*Apparatus.* X-ray diffraction (XRD) measurements were performed on Bruker Focuss D8 via ceramic monochromatized Cu K $\alpha$  radiation of 1.54178 Å, with the operating voltage of 40 kV and current of 40 mA.

Scanning electron microscopy (SEM) images were acquired by using a Hitachi S-4800 (Hitachi, Japan) microscope equipped with an energy-dispersive X-ray spectroscopy (EDS) instrumentation, and the operating voltage for SEM imaging and EDX analysis and mapping were 3 kV at 15 kV, respectively. Transmission electron microscopy (TEM) measurements were carried out on a JEM-2100, JEOL microscope.

X-ray photoelectron spectroscopy (XPS) was recorded through a Kratos Axis Ultra DLD X-ray Photoelectron Spectrometer. The XPS binding energies were calibrated using the C 1s level of 284.6 eV, which was taken as a reference.

The electrochemical performance of the samples toward oxygen evolution reaction (OER) and as a supercapacitor electrode were tested at room temperature in a three-electrode configuration on an electrochemical workstation (CHI660E), with the synthesized materials, Hg/HgO/1 M KOH electrode and Pt plate selected as the working electrode, reference electrode and counter electrode, respectively.

For OER test, the whole measurement process was conducted in 1 M KOH electrolyte. All potentials reported in this work were calculated with respect to the reversible hydrogen electrode (RHE) using the following equation:  $E(\text{RHE}) = E(\text{Hg}/\text{HgO}) + 0.059 \text{ pH} + 0.098 \text{ V}$ . Prior to the test, the electrodes were activated by cyclic voltammetry scanning at a scan rate of  $10 \text{ mV s}^{-1}$ . Linear sweep voltammetry was performed at  $5 \text{ mV s}^{-1}$  in the potential range from 0.14 to 0.94 V (vs. Hg/HgO). Tafel slopes for evaluating the OER kinetics of catalysts were acquired based on the polarization curves by plotting  $\eta$  vs.  $\log$  current density ( $j$ ). Electrochemical impedance spectroscopy (EIS) measurements were carried out under a given overpotential over the frequency range 0.01 Hz to 100 kHz. The electrochemical surface area (ESCA) of the catalysts was assessed by double-layer capacitance ( $C_{\text{dl}}$ ), which can be determined using simple CV measurements. The CV measurements were performed in a potential window with non-Faradaic processes at various scan rates. By plotting the capacitive current density at a specific potential versus scan rate, the slope of the fitted linear curve yielded the  $C_{\text{dl}}$  value.

Electrochemical supercapacitor measurements were carried out using a three-electrode setup with 6 M KOH aqueous solution as the electrolyte. The CV curves were recorded in a potential range of 0 - 0.6 V (vs. Hg/HgO) at various scan rates. The galvanostatic charge-discharge (GCD) curves at different current densities were collected and used for calculating the specific capacitance of the materials based on the equations  $C = I \Delta t / \Delta V$ , where  $I$  is the GCD current density,  $\Delta t$  is the discharge time, and  $\Delta V$  is the potential window. EIS was measured under the similar parameter

settings as OER.

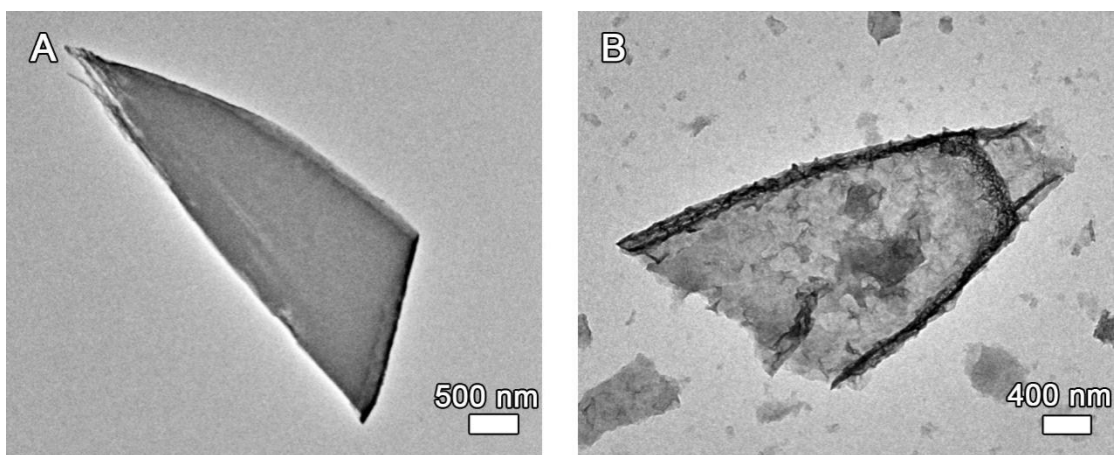

**Figure S1.** TEM images of (A) MOF-Co and (B) NiCo-LDH.

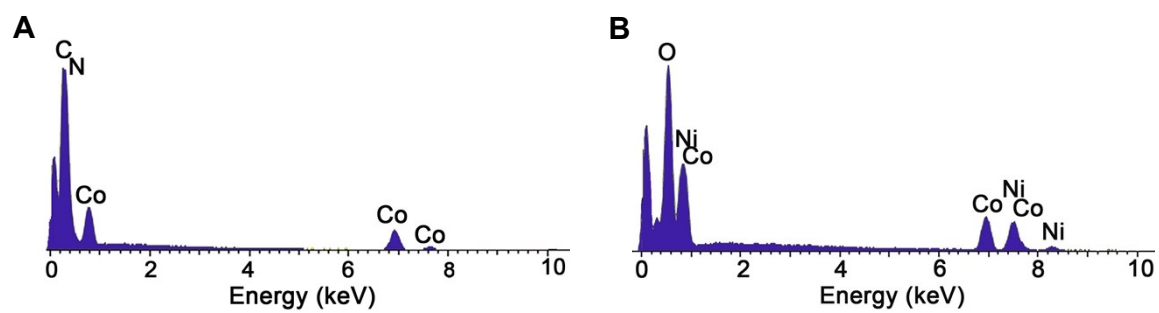

**Figure S2.** The EDX results of (A) MOF-Co and (B) NiCo-LDH.

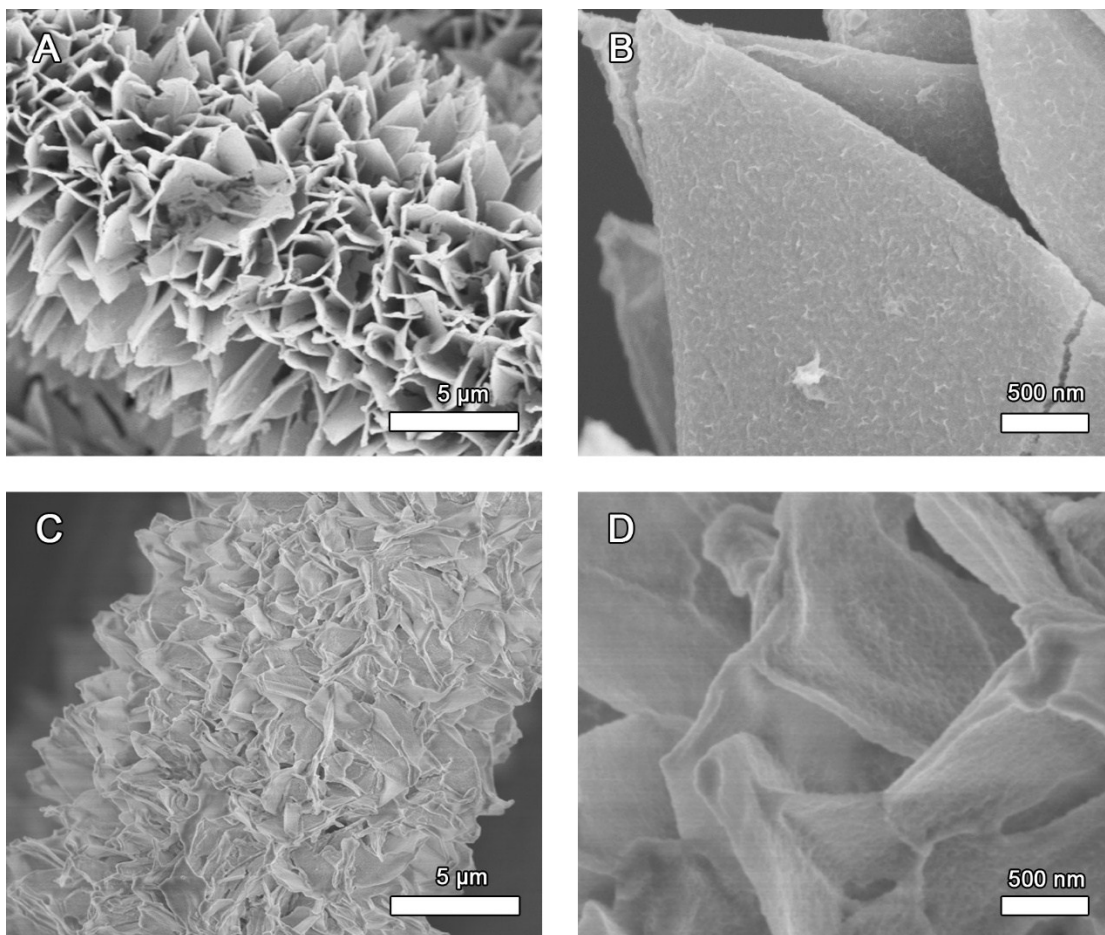

**Figure S3.** SEM images showing (A,B) insufficient etching with 1 h reaction time. (C,D) Destruction of the arrays due to the excessive etching of MOF-Co when the ion-exchange reaction is extended to 3 h.

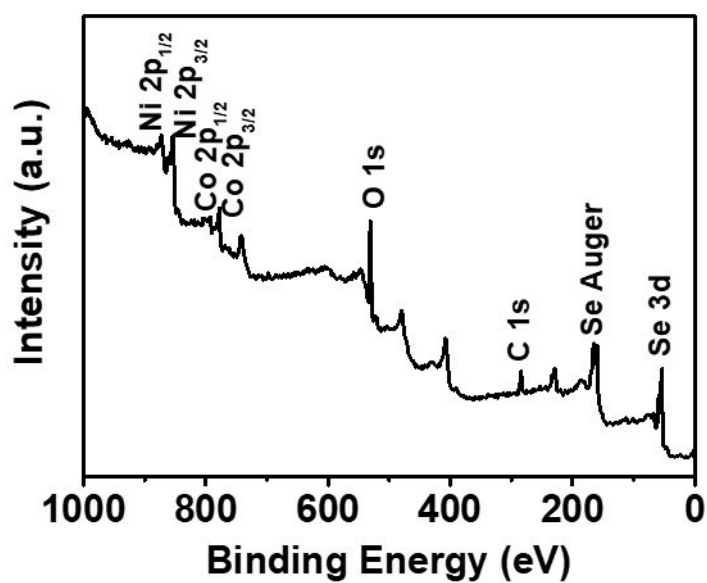

**Figure S4.** XPS survey spectrum of (Ni,Co)Se<sub>2</sub>/CC.

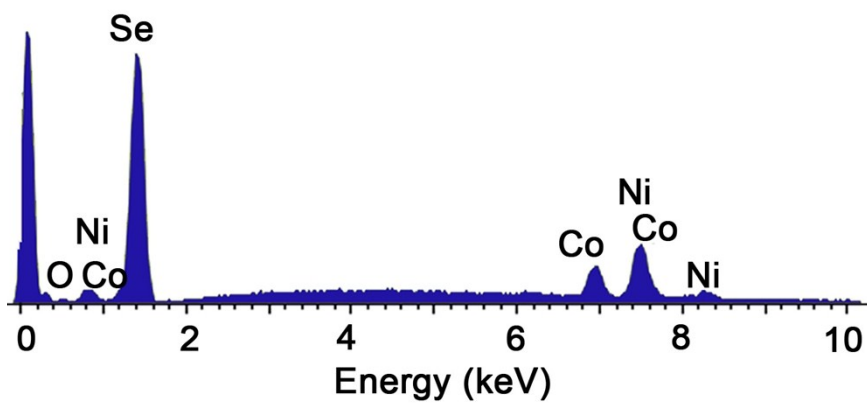

**Figure S5.** EDX result of (Ni,Co)Se<sub>2</sub>/CC.



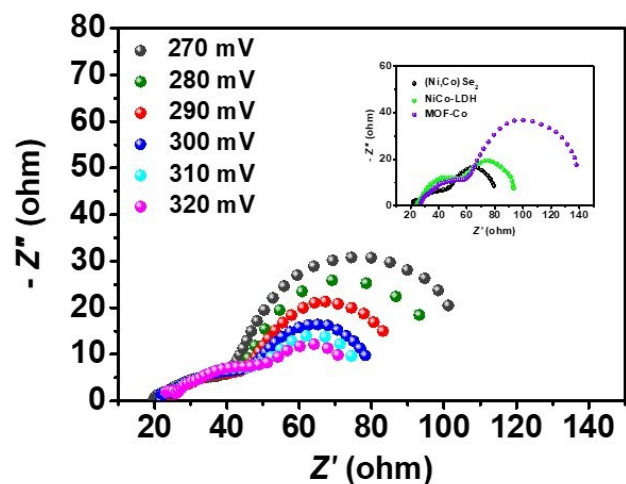

**Figure S6.** Nyquist plots for  $(\text{Ni,Co})\text{Se}_2$  at various overpotentials. Inset shows the Nyquist plots of  $(\text{Ni,Co})\text{Se}_2$ , NiCo-LDH and MOF-Co at a constant overpotential of 300 mV.

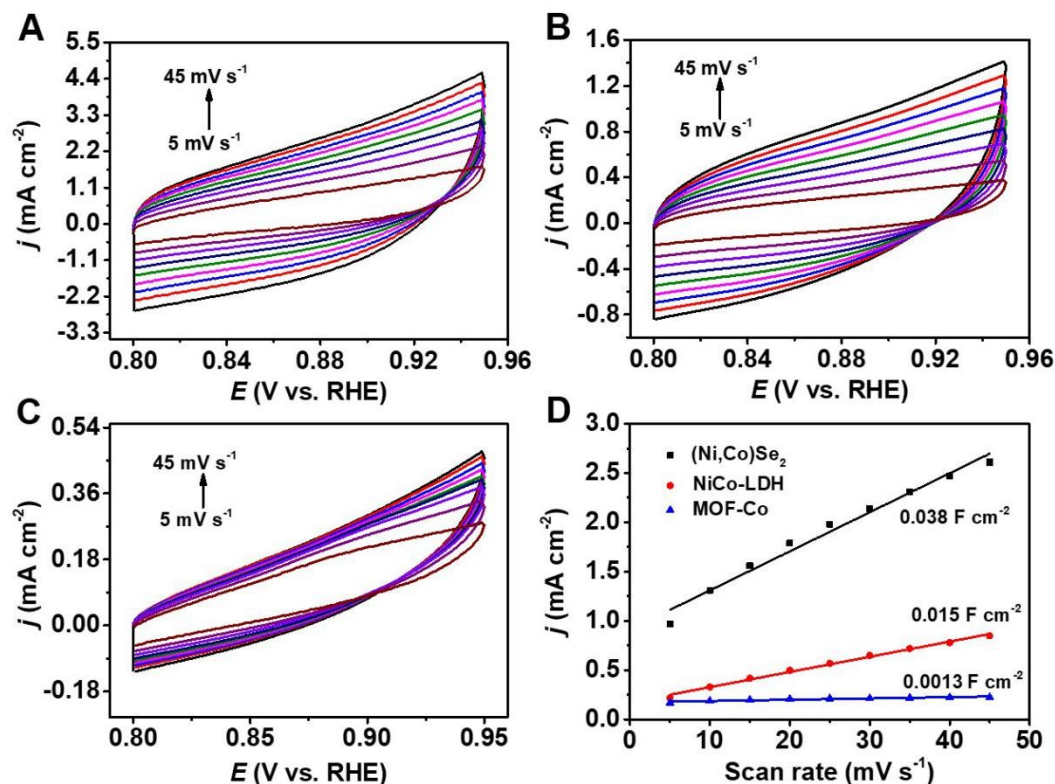

**Figure S7.** Measurements of the electrochemically active surface areas of the electrode samples: cyclic voltammograms at different scan rates for (A)

(Ni,Co)Se<sub>2</sub>/CC, (B) NiCo-LDH/CC, and (C) MOF-Co/CC. (D) Plots of the scan rate versus the current density at 0.88 V vs. RHE.

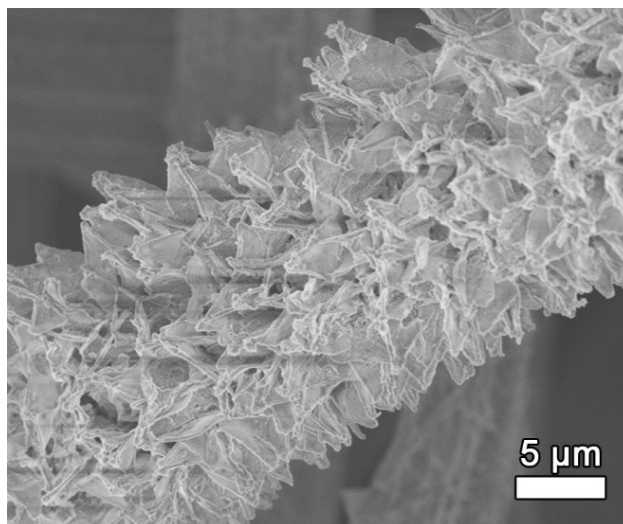

**Figure S8.** SEM image of (Ni,Co)Se<sub>2</sub>/CC after OER test.

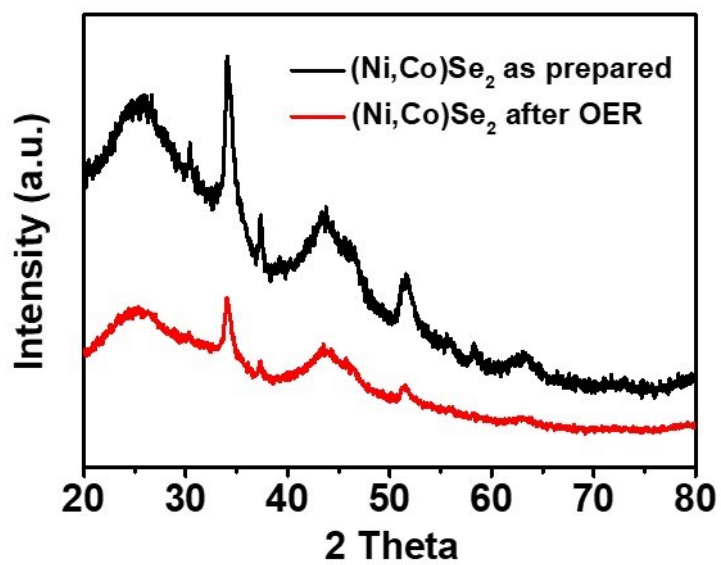

**Figure S9.** XRD patterns of the (Ni,Co)Se<sub>2</sub>/CC before and after OER test.

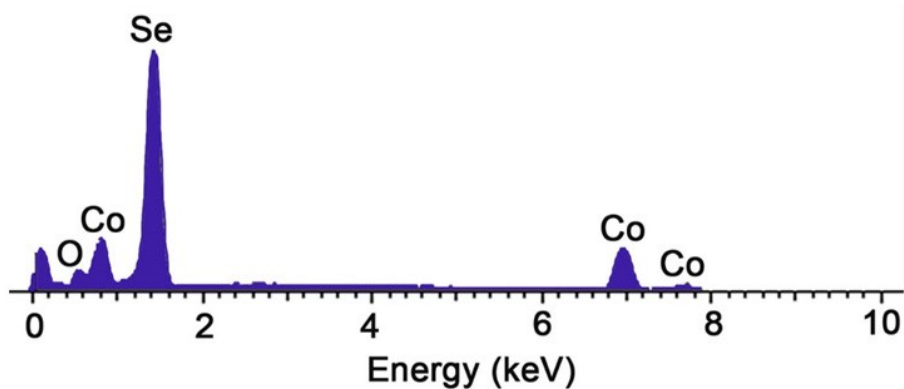

Figure S10. EDX result of CoSe<sub>2</sub>/CC.

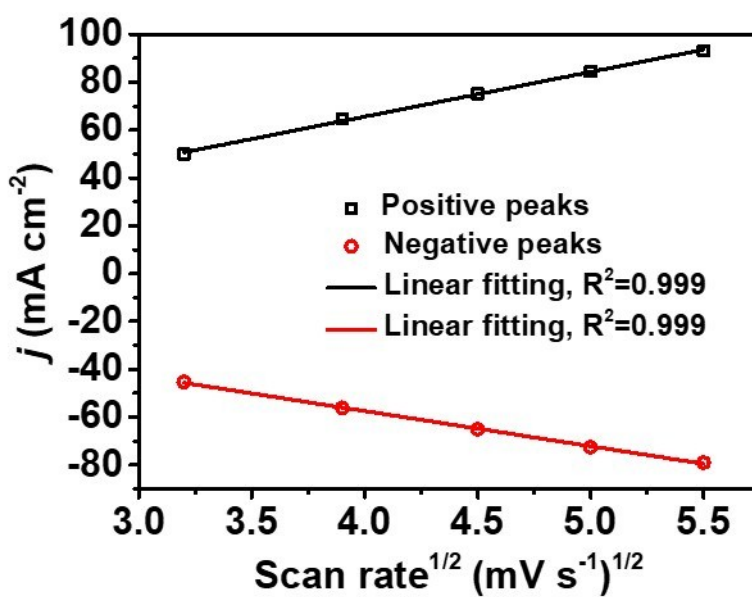

Figure S11. Plots of corresponding anodic and cathodic peak current densities presented in Figure 5A versus the square root of scan rate.

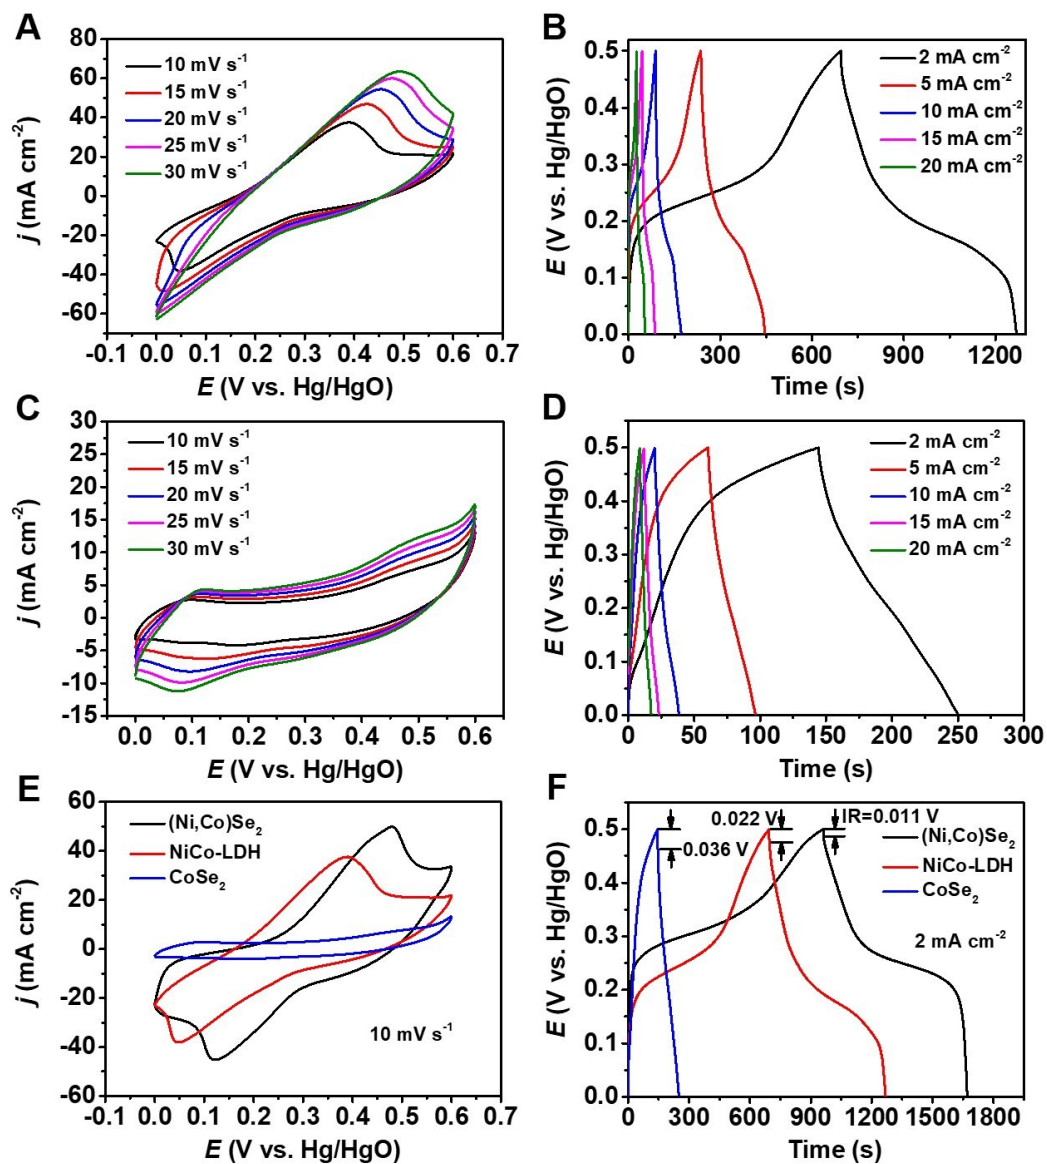

**Figure S12.** (A) CV curves and (B) GCD curves of NiCo-LDH/CC; (C) CV curves and (D) GCD curves of CoSe<sub>2</sub>/CC. (E) CV curves at 10 mV s<sup>-1</sup> and (F) GCD curves at 2 mA cm<sup>-2</sup> for (Ni,Co)Se<sub>2</sub>/CC, NiCo-LDH/CC and CoSe<sub>2</sub>/CC.

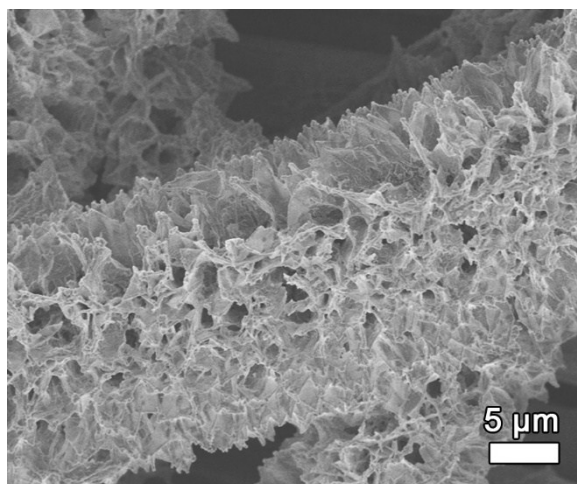

**Figure S13.** SEM image of (Ni,Co)Se<sub>2</sub>/CC after 2000 charge-discharge cycles.

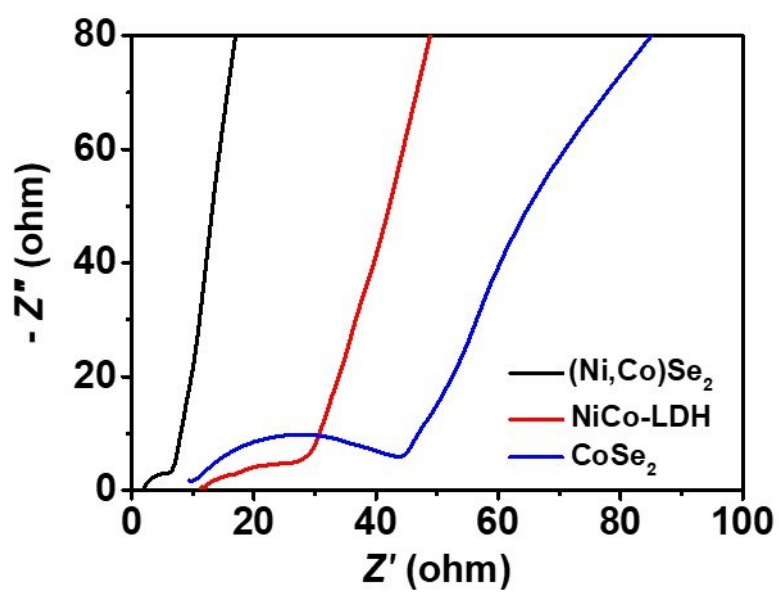

**Figure S14.** EIS plots of (Ni,Co)Se<sub>2</sub>, NiCo-LDH and CoSe<sub>2</sub> tested at an open circuit potential.

**Table S1.** Comparison of electrochemical OER performance of (Ni,Co)Se<sub>2</sub>/CC and other selenides catalysts in 1 M KOH solution.

| Catalysts                                        | Substrate           | Current density<br>(mA cm <sup>-2</sup> ) | Overpotential<br>(mV) | Tafel slope<br>(mV dec <sup>-1</sup> ) | Ref.             |
|--------------------------------------------------|---------------------|-------------------------------------------|-----------------------|----------------------------------------|------------------|
| (Ni, Co) <sub>0.85</sub> Se<br>nanotubes         | Carbon Cloth        | 10                                        | 255                   | 79                                     | 1                |
| NiSe <sub>2</sub> nanowrinkles                   | Ni foam             | 100                                       | 337                   | 63                                     | 2                |
| CoSe <sub>2</sub> nanoparticles                  | Carbon cloth        | 10                                        | 297                   | 41                                     | 3                |
| (Ni,Co) <sub>0.85</sub> Se<br>nanosheets         | Ni foam             | 20                                        | 287                   | 87                                     | 4                |
| Co-Ni-Se/C                                       | Ni foam             | 30                                        | 275                   | 63                                     | 5                |
| Co-doped NiSe <sub>2</sub><br>nanoparticles film | Ti plate            | 100                                       | 320                   | 94                                     | 6                |
| CoNiSe <sub>2</sub> nanorods                     | Ni foam             | 100                                       | 307                   | 79                                     | 7                |
| NiCoSe <sub>2</sub> nanobrush                    | Ni foam             | 10                                        | 274                   | 61                                     | 8                |
| <b>Hollow (Ni,Co)Se<sub>2</sub><br/>arrays</b>   | <b>Carbon cloth</b> | <b>10</b>                                 | <b>256</b>            | <b>74</b>                              | <b>This work</b> |

**Table S2.** Comparison of electrochemical performance of (Ni,Co)Se<sub>2</sub>/CC and other selenides electrodes for supercapacitors.

| Electrode                                  | Substrate           | Electrolyte (KOH) | Current density             | Specific Capacitance          | Ref.             |
|--------------------------------------------|---------------------|-------------------|-----------------------------|-------------------------------|------------------|
| (Ni,Co) <sub>0.85</sub> Se                 | Carbon fabric       | 1 M               | 4 mA cm <sup>-2</sup>       | 2.33 F cm <sup>-2</sup>       | 9                |
| Hollow core-branch CoSe <sub>2</sub>       | Carbon cloth        | 3 M               | 1 mA cm <sup>-2</sup>       | 759.5 F g <sup>-1</sup>       | 10               |
| NiSe nanorods                              | Nickel foam         | 6 M               | 5 mA cm <sup>-2</sup>       | 6.81 F cm <sup>-2</sup>       | 11               |
| Ni <sub>0.85</sub> Se nanosheets           | Nickel foam         | 3 M               | 1 A g <sup>-1</sup>         | 3105 F g <sup>-1</sup>        | 12               |
| Ni-Co selenide nanorods                    | Nickel foam         | 1 M               | 4 mA cm <sup>-2</sup>       | 2.61 F cm <sup>-2</sup>       | 13               |
| Porous CoSe <sub>2</sub> nanosheets        | Carbon cloth        | 3 M               | 1 mA cm <sup>-2</sup>       | 713.9 F g <sup>-1</sup>       | 14               |
| Bamboo like CoSe <sub>2</sub> arrays       | Carbon cloth        | 3 M               | 1 mA cm <sup>-2</sup>       | 544.6 F g <sup>-1</sup>       | 15               |
| <b>Hollow (Ni,Co)Se<sub>2</sub> arrays</b> | <b>Carbon cloth</b> | <b>6 M</b>        | <b>2 mA cm<sup>-2</sup></b> | <b>2.85 F cm<sup>-2</sup></b> | <b>This work</b> |

### Supplementary References

1. C. Xia, Q. Jiang, C. Zhao, M. N. Hedhili and H. N. Alshareef, *Adv. Mater.*,

- 2016, **28**, 77-85.
2. J. Zhang, Y. Wang, C. Zhang, H. Gao, L. Lv, L. Han and Z. Zhang, *ACS Sustain. Chem. Eng.*, 2018, **6**, 2231-2239.
  3. C. Sun, Q. Dong, J. Yang, Z. Dai, J. Lin, P. Chen, W. Huang and X. Dong, *Nano Res.*, 2016, **9**, 2234-2243.
  4. K. Xiao, L. Zhou, M. Shao and M. Wei, *J. Mater. Chem. A*, 2018, **6**, 7585-7591.
  5. F. Ming, H. Liang, H. Shi, X. Xu, G. Mei and Z. Wang, *J. Mater. Chem. A*, 2016, **4**, 15148-15155.
  6. T. Liu, A. M. Asiri and X. Sun, *Nanoscale*, 2016, **8**, 3911-3915.
  7. T. Chen and Y. Tan, *Nano Res.*, 2018, **11**, 1331-1344.
  8. H. Zhu, R. Jiang, X. Chen, Y. Chen and L. Wang, *Sci. Bull.*, 2017, **62**, 1373-1379.
  9. C. Xia, Q. Jiang, C. Zhao, P. M. Beaujuge and H. N. Alshareef, *Nano Energy*, 2016, **24**, 78-86.
  10. T. Chen, S. Li, J. Wen, P. Gui, Y. Guo, C. Guan, J. Liu and G. Fang, *Small*, 2017, **14**, 1700979.
  11. Y. Tian, Y. Ruan, J. Zhang, Z. Yang, J. Jiang and C. Wang, *Electrochim. Acta*, 2017, **250**, 327-334.
  12. L. Du, W. Du, H. Ren, N. Wang, Z. Yao, X. Shi, B. Zhang, J. Zai and X. Qian, *J. Mater. Chem. A*, 2017, **5**, 22527-22535.
  13. P. Xu, W. Zeng, S. Luo, C. Ling, J. Xiao, A. Zhou, Y. Sun and K. Liao,



*Electrochim. Acta*, 2017, **241**, 41-49.

14. T. Chen, S. Li, J. Wen, P. Gui and G. Fang, *ACS Appl. Mater. Interfaces*, 2017, **9**, 35927-35935.
15. C. Tian, L. Songzhan, G. Pengbin, W. Jian, F. Xuemei and F. Guojia, *Nanotechnology*, 2018, **29**, 205401.
